# Supplementary material
Source: HighWire-hosted journal article supplement (https://cmaj.ca/highwire/filestream/75002/field_highwire_adjunct_files/3/191292-res-3-at.pdf)
Supplement: 191292-res-3-at.pdf [file 191292-res-3-at.pdf]

## Appendix 3 (as submitted by the authors): Supplementary Figure 1

### Incidence

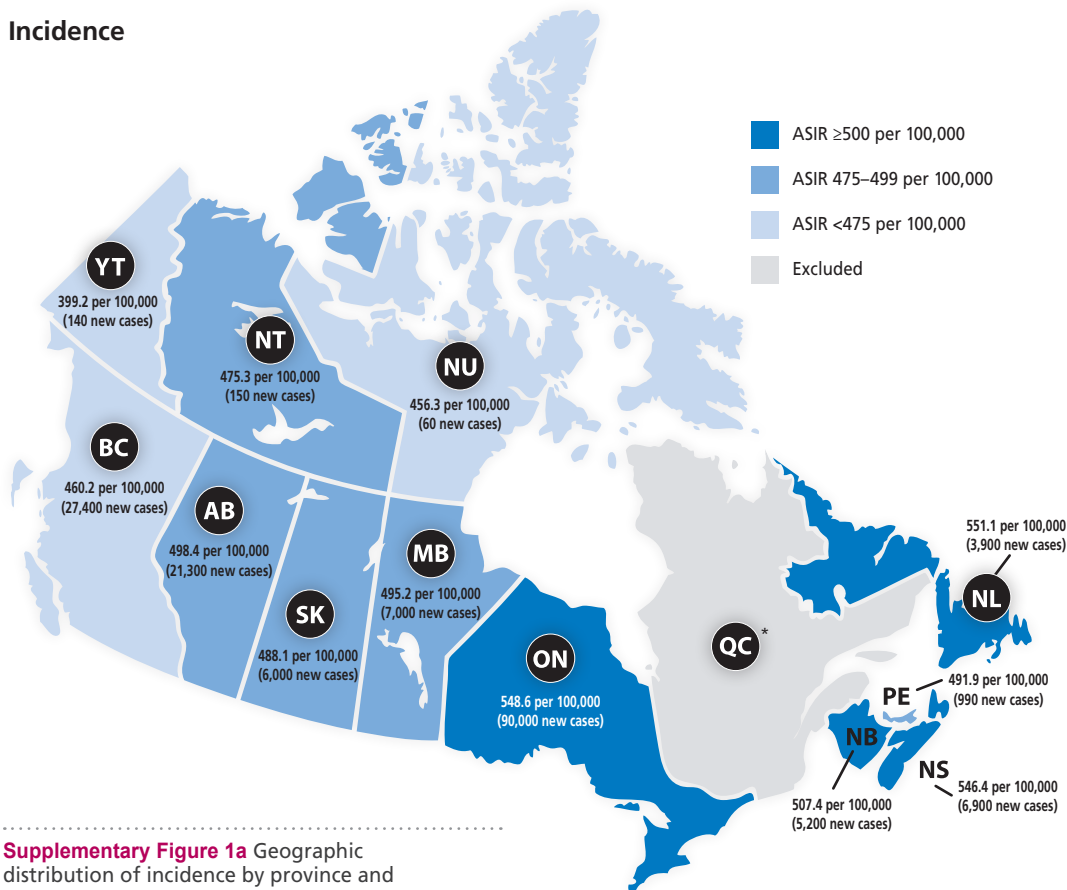

**Supplementary Figure 1a** Geographic distribution of incidence by province and territory, both sexes, Canada, 2020

ASIR=age-standardized incidence rate; BC=British Columbia; AB=Alberta; SK=Saskatchewan; MB=Manitoba; ON=Ontario; QC=Quebec; NB=New Brunswick; NS=Nova Scotia; PE=Prince Edward Island; NL=Newfoundland & Labrador; YT=Yukon; NT=Northwest Territories; NU=Nunavut

\* Estimates for Quebec incidence were not included because a different projection method was used for Quebec than the other regions, meaning the estimates are not comparable.

Appendix to: Brenner DR, Weir HK, Demers AA, et al. Projected burden of cancer in Canada in 2020. *CMAJ* 2020. doi: 10.1503/cmaj.191292. Copyright © 2020 The Author(s) or their employer(s).

To receive this resource in an accessible format, please contact us at [cmajgroup@cmaj.ca](mailto:cmajgroup@cmaj.ca).

## Mortality

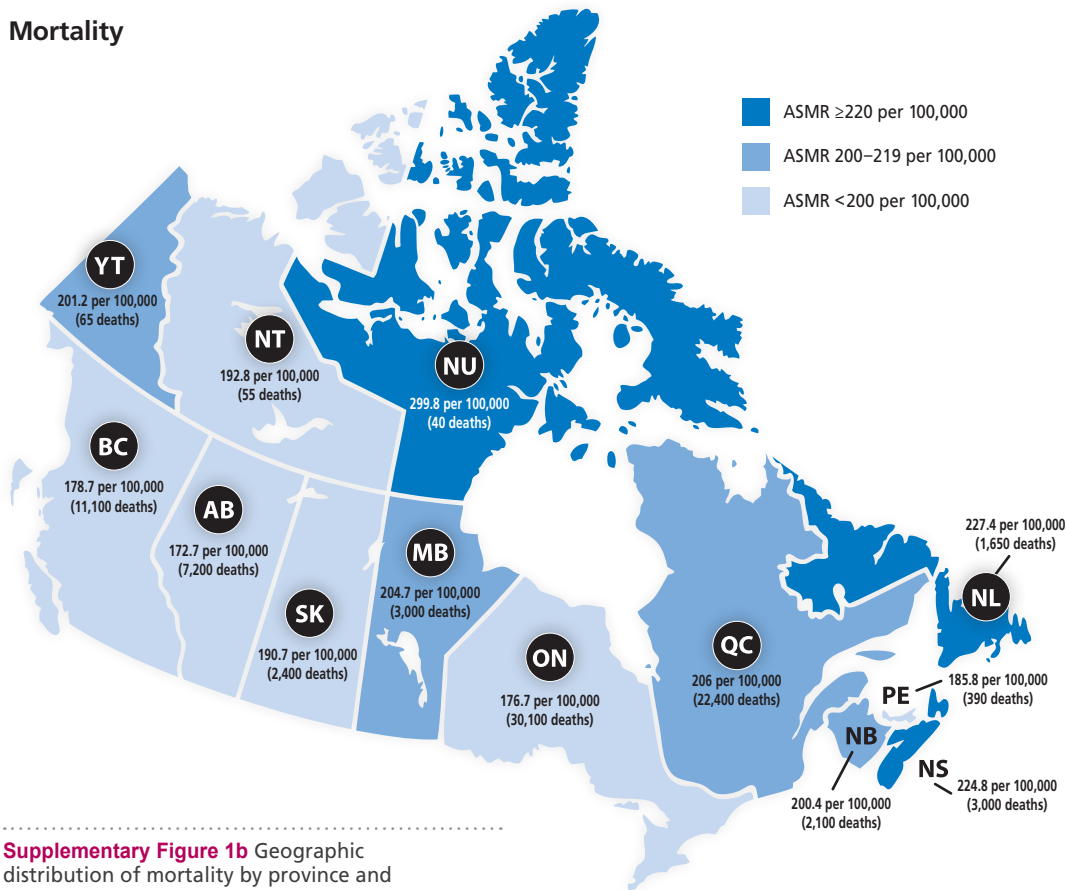

**Supplementary Figure 1b** Geographic distribution of mortality by province and territory, both sexes, Canada, 2020

ASMR=age-standardized mortality rate; BC=British Columbia; AB=Alberta; SK=Saskatchewan; MB=Manitoba; ON=Ontario; QC=Quebec; NB=New Brunswick; NS=Nova Scotia; PE=Prince Edward Island; NL=Newfoundland & Labrador; YT=Yukon; NT=Northwest Territories; NU=Nunavut
